# Supplementary material for: Anti-inflammatory effects of Samsoeum, a Korean medicine for health insurance, on chronic bronchitis caused by lipopolysaccharide in rats
Source: Royal Society of Chemistry journal article supplement (doi:10.1039/d0fo01171a), 2020-01-01
Supplement: d0fo01171a1.pdf [file d0fo01171a1.pdf]

Supplementary Table 1. Assessment of accuracy by HPLC

| Compound                  | Accuracy (%; 100× The calculated mean values/The absolute value) |       |       |       |       |       |       |            |
|---------------------------|------------------------------------------------------------------|-------|-------|-------|-------|-------|-------|------------|
|                           | 0                                                                | 1     | 2     | 4     | 8     | 16    | 32    | 64 (µg/ml) |
| 3,4-Dihydrobenzylaldehyde | -                                                                | 100.9 | 106.3 | 94.1  | 103.2 | 91.4  | 88.7  | 96.5       |
| Puerarin                  | 94.6                                                             | 88.3  | 90.8  | 86.3  | 96.1  | 95.5  | 90.7  | 99.0       |
| Daidzin                   | 103.3                                                            | 98.2  | 97.3  | 90.7  | 100.9 | 96.0  | 91.3  | 103.2      |
| Spinosin                  | 96.7                                                             | 104.2 | 98.2  | 101.0 | 98.4  | 95.5  | 96.6  | 92.3       |
| Rutin                     | 92.9                                                             | 74.5  | 84.9  | 83.1  | 93.7  | 99.5  | 92.7  | 83.2       |
| Liquiritin                | 74.2                                                             | 105.2 | 102.6 | 109.0 | 105.9 | 108.9 | 101.9 | 112.1      |
| Nodakenin                 | 99.0                                                             | 97.8  | 96.1  | 94.9  | 96.2  | 93.5  | 89.1  | 95.1       |
| Narirutin                 | 95.8                                                             | 98.9  | 99.1  | 99.7  | 97.8  | 98.1  | 99.7  | 99.5       |
| Naringin                  | 93.0                                                             | 103.0 | 114.4 | 103.1 | 110.3 | 111.3 | 100.5 | 106.5      |
| Hesperidin                | 100.                                                             | 100.6 | 100.1 | 100.3 | 100.9 | 100.2 | 100.8 | 100.6      |
| Rosmarinic acid           | -                                                                | 88.2  | 83.4  | 97.0  | 105.9 | 97.3  | 94.5  | 99.7       |
| Poncirin                  | 88.6                                                             | 102.7 | 100.2 | 109.9 | 106.8 | 95.2  | 92.2  | 97.7       |
| Glycirrizic acid          | 70.8                                                             | 100.2 | 99.7  | 100.8 | 99.2  | 99.2  | 99.1  | 100.0      |
| 6-Gingerol                | 86.3                                                             | 86.9  | 88.9  | 91.3  | 92.1  | 91.7  | 90.0  | 96.8       |
| 18-Glyrrhetic acid        | 77.9                                                             | 103.0 | 101.1 | 94.9  | 102.6 | 98.0  | 93.2  | 100.2      |
| Ginsenoside Rb 1          | 95.1                                                             | 105.7 | 103.1 | 100.9 | 90.5  | 91.7  | 89.4  | 99.9       |

Supplementary Table 2. Analysis of concentration in SSE

| Compounds |                           | Concentration (mg/dose*) |
|-----------|---------------------------|--------------------------|
| (1)       | 3,4-Dihydrobenzylaldehyde | N.D                      |
| (2)       | Puerarin                  | 30.2                     |
| (3)       | Daidzin                   | 3.1                      |
| (4)       | Spinosin                  | N.D                      |
| (5)       | Rutin                     | 2.1                      |
| (6)       | Liquiritin                | 12.0                     |
| (7)       | Nodakenin                 | 2.0                      |
| (8)       | Narirutin                 | 4.3                      |
| (9)       | Naringin                  | 14.0                     |
| (10)      | Hesperidin                | 4.8                      |
| (11)      | Rosmarinic acid           | 2.0                      |
| (12)      | Poncirin                  | 0.4                      |
| (13)      | Glycirrizic acid          | 12.2                     |
| (14)      | 6-Gingerol                | 0.2                      |
| (15)      | 18-Glyrrhetic acid        | 0.5                      |
| (16)      | Ginsenoside Rb 1          | 0.7                      |

\*dose = daily intake dose, 20 g.
